# Supplementary material for: Multicenter Retrospective Study of Vascular Infections and Endocarditis Caused by Campylobacter spp., France
Source: PubMed Central journal article supplement (PMC9973684; doi:10.3201/eid2903.221417), 2023-03
Supplement: 22-1417-Techapp-s1.pdf [file 22-1417-Techapp-s1.pdf]

# Multicenter Retrospective Study of Vascular Infections and Endocarditis Caused by *Campylobacter* spp., France

## Appendix

**Appendix Table.** Literature review of endocarditis due to *Campylobacter* spp.\*

| Case | Sex | Age | Localization            | Species                     | Ref  |
|------|-----|-----|-------------------------|-----------------------------|------|
| 1    | F   | 60  | Aortic valve            | <i>Campylobacter fetus</i>  | (1)  |
| 2    | M   | 75  | Aortic valve            | <i>C. fetus</i>             | (2)  |
| 3    | M   | 85  | Mitral valve            | <i>C. fetus</i>             | (3)  |
| 4    | M   | 51  | Tricuspid valve         | <i>C. fetus</i>             | (4)  |
| 5    | M   | 91  | Aortic valve            | <i>C. fetus</i>             | (5)  |
| 6    | M   | 52  | Tricuspid valve         | <i>C. fetus</i>             | (6)  |
| 7    | M   | 49  | Tricuspid valve         | <i>C. fetus</i>             | (7)  |
| 8    | M   | 44  | Aortic valve            | <i>C. fetus</i>             | (8)  |
| 9    | H   | 41  | Aortic valve            | <i>Campylobacter jejuni</i> | (9)  |
| 10   | M   | 48  | Tricuspid valve         | <i>C. fetus</i>             | (10) |
| 11   | F   | 85  | Prosthetic aortic valve | <i>C. fetus</i>             | (11) |
| 12   | M   | 50  | Aortic valve            | <i>C. jejuni</i>            | (12) |
| 13   | M   | 70  | Aortic valve            | <i>C. fetus</i>             | (13) |
| 14   | M   | 18  | Aortic valve            | <i>C. fetus</i>             | (14) |
| 15   | F   | 76  | Prosthetic aortic valve | <i>C. fetus</i>             | (1)  |
| 16   | M   | 70  | Prosthetic aortic valve | <i>C. fetus</i>             | (15) |
| 17   | M   | 61  | Prosthetic aortic valve | <i>C. fetus</i>             | (16) |
| 18   | M   | 65  | Pace maker              | <i>C. fetus</i>             | (17) |
| 19   | F   | 84  | Prosthetic aortic valve | <i>C. fetus</i>             | (18) |
| 20   | F   | 48  | Prosthetic mitral valve | <i>C. fetus</i>             | (19) |
| 21   | M   | 65  | Post-Bentall graft      | <i>C. fetus</i>             | (20) |

\*A systematic review was conducted. Screened studies were case report written in English, fully accessible and exhaustive. Searching was performed in Pubmed, EMBASE and Google Scholar databases.

## References

1. Farrugia DC, Eykyn SJ, Smyth EG. *Campylobacter fetus* endocarditis: two case reports and review. Clin Infect Dis. 1994;18:443–6. [PubMed https://doi.org/10.1093/clinids/18.3.443](https://doi.org/10.1093/clinids/18.3.443)
2. Suy F, Le Dû D, Roux AL, Hanachi M, Dinh A, Crémieux AC. Meningitis and endocarditis caused by *Campylobacter fetus* after raw-liver ingestion. J Clin Microbiol. 2013;51:3147–50. [PubMed https://doi.org/10.1128/JCM.00631-13](https://doi.org/10.1128/JCM.00631-13)
3. Rollot K, Albert JD, Werner S, Tattevin P, Cozic I, Perdriger A, et al. *Campylobacter fetus* septic arthritis revealing a malignancy. Joint Bone Spine. 2004;71:63–5. [PubMed https://doi.org/10.1016/S1297-319X\(03\)00094-0](https://doi.org/10.1016/S1297-319X(03)00094-0)

4. Mahe I, Perdrix C, Maniere T, Holeman A, Diemer M, Bergmann JF. A case of *Campylobacter fetus* endocarditis of the tricuspid valve unaccompanied by fever. *Am J Med*. 2001;111:418. [PubMed](#) [https://doi.org/10.1016/S0002-9343\(01\)00874-9](https://doi.org/10.1016/S0002-9343(01)00874-9)
5. Baty V, Hoen B, Selton-Suty C, Schuhmacher H, Peiffert B, Danchin N, et al. *Campylobacter fetus* endocarditis manifested by a popliteal mycotic aneurysm [in French]. *Presse Med*. 1998;27:357–8. [PubMed](#)
6. Miki K, Maekura R, Hiraga T, Hirotani A, Hashimoto H, Kitada S, et al. Infective tricuspid valve endocarditis with pulmonary emboli caused by *Campylobacter fetus* after tooth extraction. *Intern Med*. 2005;44:1055–9. [PubMed](#) <https://doi.org/10.2169/internalmedicine.44.1055>
7. Ohshima H, Itaoka Y, Ohno M, Hara K, Kashida M, Kuwako K, et al. A case of right-sided infective endocarditis in a drug addict [in Japanese]. *Kokyu To Junkan*. 1990;38:277–81. [PubMed](#)
8. Wozniak R, Middleton J, Chmel H, de la Cruz C, Young R. Gram-negative endocarditis caused by *Campylobacter fetus*. *South Med J*. 1978;71:1311–2. [PubMed](#) <https://doi.org/10.1097/00007611-197810000-00032>
9. Bucknell SJ, Le T, Amerena J, Hill DG, McDonald M. Aortic dissection associated with *Campylobacter aortitis*. *Heart Lung Circ*. 2000;9:88–91. [PubMed](#) <https://doi.org/10.1046/j.1444-2892.2000.00027.x>
10. Sasaki Y, Suehiro S, Shibata T, Minamimura H, Kumano H, Kinoshita H. A case of isolated tricuspid valve endocarditis caused by *Campylobacter fetus* [in Japanese]. *Nihon Kyobu Geka Gakkai Zasshi*. 1997;45:1844–7. [PubMed](#)
11. Petridou C, Strakova L, Simpson R. *Campylobacter fetus* prosthetic valve endocarditis presenting as a stroke. *JMM Case Rep*. 2018;5:e005147. [PubMed](#) <https://doi.org/10.1099/jmmcr.0.005147>
12. Sitter T, Bauer MF, Held E. Acute aortic insufficiency following endocarditis due to infection with *Campylobacter fetus* subspecies fetus [in German]. *Dtsch Med Wochenschr*. 1992;117:1355–8. [PubMed](#) <https://doi.org/10.1055/s-2008-1062450>
13. Allerberger F, Kasten MJ, Anhalt JP. *Campylobacter fetus* subspecies fetus infection. *Klin Wochenschr*. 1991;69:813–6. [PubMed](#) <https://doi.org/10.1007/BF01744276>
14. Usui N, Sakai K, Muraguchi T, Tsukamoto Y, Kimura E, Nishizawa K, et al. Cases of infective endocarditis caused by *Campylobacter fetus*. *Osaka City Med J*. 1989;35:63–9. [PubMed](#)
15. Reid MJA, Shannon EM, Baxi SM, Chin-Hong P. Steak tartare endocarditis. *BMJ Case Rep*. 2016;bcr2015212928. <http://dx.doi.org/10.1136/bcr-2015-212928> **PMID: 26917729**

16. Peetermans WE, De Man F, Moerman P, van de Werf F. Fatal prosthetic valve endocarditis due to *Campylobacter fetus*. J Infect. 2000;41:180–2. [PubMed https://doi.org/10.1053/jinf.2000.0699](https://doi.org/10.1053/jinf.2000.0699)
17. Sękowska A, Fabiszak T, Mikucka A, Andrzejewska M, Kruszyńska E, Gospodarek E, et al. A case of defibrillator-associated infective endocarditis due to *Campylobacter fetus*. Folia Microbiol (Praha). 2016;61:529–32. [PubMed https://doi.org/10.1007/s12223-016-0466-7](https://doi.org/10.1007/s12223-016-0466-7)
18. Désidéri-Vaillant C, Guichon J-M, Noyer V, Nedelec Y, Galinat H, Sapin-Lory J, et al. *Campylobacter fetus* endocarditis: a case report [in French]. Ann Biol Clin (Paris). 2013;71:465–7. <https://doi.org/10.1684/abc.2013.0862> **PMID: 23906576**
19. Caramelli B, Mansur AJ, Grinberg M, Mendes CM, Pileggi F. *Campylobacter fetus* endocarditis on a prosthetic heart valve. South Med J. 1988;81:802–3. [PubMed https://doi.org/10.1097/00007611-198806000-00028](https://doi.org/10.1097/00007611-198806000-00028)
20. Haruyama A, Toyoda S, Kikuchi M, Arikawa T, Inami S, Otani N, et al. *Campylobacter fetus* as cause of prosthetic valve endocarditis. Tex Heart Inst J. 2011;38:584–7. [PubMed](https://doi.org/10.1007/s12223-011-0000-0)
